# Supplementary material for: Study of the Efficacy of Probiotic Bacteria to Reduce Acrylamide in Food and In Vitro Digestion
Source: MDPI journal article supplement (doi:10.3390/foods11091263), 2022-04-27

## Supplementary Materials

**Figure S1. Supplementary material.** The growth curves of probiotic strains: *L. acidophilus* (a, ■), *L. casei* (b, ●), *L. rhamnosus* (c, ▲), *B. longum* (d, ▼) and *B. animalis subsp. Lactis* (e, ◆).

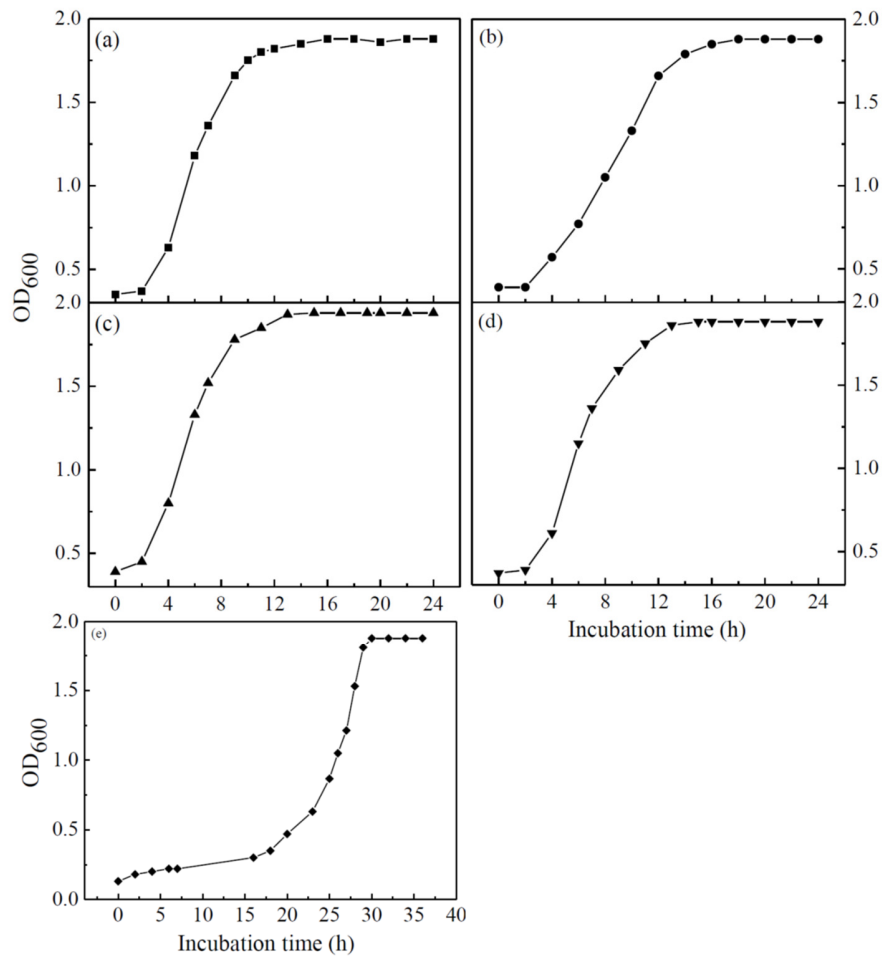

**Table S1. Supplementary material.** Constituents of the various synthetic digestion fluids of the in vitro digestion model (per liter).

| Digestive Juice                                 | Saliva                                                                                                                                  | Gastric Juice                                                                                                                                        | Duodenal Juice                                                                                                                     | Bile Juice                                                            |
|-------------------------------------------------|-----------------------------------------------------------------------------------------------------------------------------------------|------------------------------------------------------------------------------------------------------------------------------------------------------|------------------------------------------------------------------------------------------------------------------------------------|-----------------------------------------------------------------------|
| Inorganic                                       | 0.3 g NaCl<br>0.9 g KCl<br>1.7 g NaHCO <sub>3</sub><br>0.9 g NaH <sub>2</sub> PO <sub>4</sub><br>0.57 g NaSO <sub>4</sub><br>0.2 g KSCN | 0.82 g KCl<br>0.27 g NaH <sub>2</sub> PO <sub>4</sub><br>0.4 g CaCl <sub>2</sub> ·2H <sub>2</sub> O<br>0.31 g NH <sub>4</sub> Cl<br>6.5 mL HCl (37%) | 0.56 g KCl<br>3.39 g NaHCO <sub>3</sub><br>0.08 g KH <sub>2</sub> PO <sub>4</sub><br>0.05 g MgCl <sub>2</sub><br>0.18 mL HCl (37%) | 0.38 g KCl<br>5.79 g NaHCO <sub>3</sub><br>0.15 mL HCl (37%)          |
| Organic                                         | 0.2 g urea                                                                                                                              | 0.65 g glucose<br>0.02 g glucuronic acid<br>0.33 g glucosamine hydrochloride<br>0.085 g urea                                                         | 0.1 g urea                                                                                                                         | 0.25 g urea                                                           |
| Add to the mixture organic + inorganic solution | 290 mg $\alpha$ -amylase<br>15 mg uric acid<br>25 mg mucin                                                                              | 1 g BSA<br>2.5 g pepsine<br>3 g mucin                                                                                                                | 0.2 g CaCl <sub>2</sub> ·2H <sub>2</sub> O<br>1 g BSA<br>9 g pancreatin<br>1.5 g lipase                                            | 0.22 g CaCl <sub>2</sub> ·2H <sub>2</sub> O<br>1.8 g BSA<br>30 g Bile |
| pH                                              | 7.9 $\pm$ 0.2                                                                                                                           | 1.30 $\pm$ 0.02                                                                                                                                      | 8.8 $\pm$ 0.2                                                                                                                      | 8.2 $\pm$ 0.2                                                         |

**Table S2. Supplementary material.** The mean recoveries of two food matrices (biscuits and chips).

| Food matrices       | Mean recovery (%) |
|---------------------|-------------------|
| Sample 1 (biscuits) | 97.0 $\pm$ 0.1%   |
| Sample 2 (chips)    | 92.8 $\pm$ 0.1%   |

**Figure S2. Supplementary material.** Schematic representation of *in vitro* digestion model used.

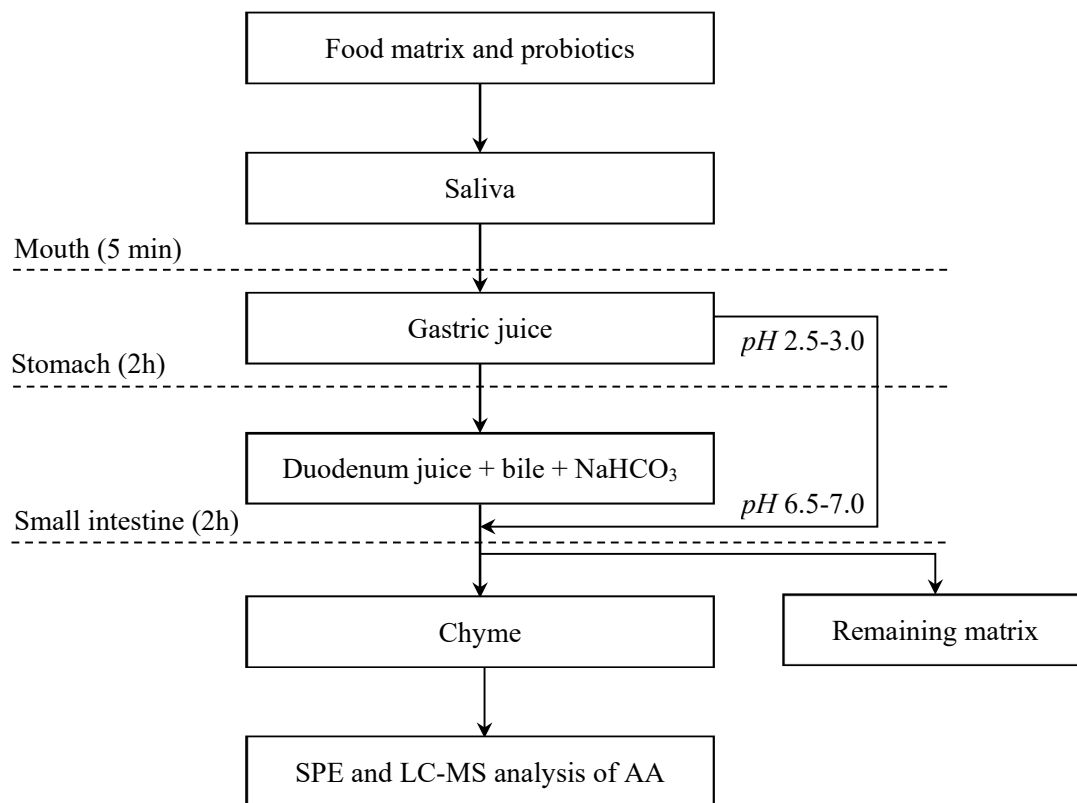

**Figure S3. Supplementary material.** Acrylamide (AA) concentration of spiked food sample 1 (biscuits) and food sample 2 (chips) after incubation with PBS solution at three different pH conditions (pH 2.5-3.0, 6.5-7.0 and 10.5-11.0) for 4h at 37 °C. The food samples were spiked to a concentration of 750 ng AA/g food.

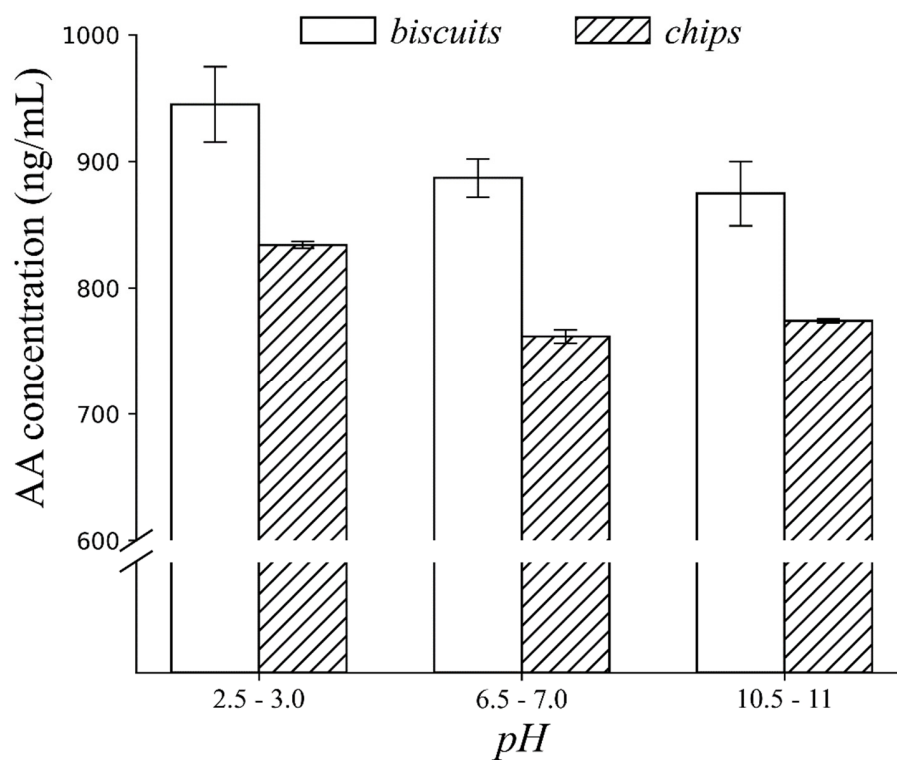

Supplement: s1 [file s1]
